# Supplementary material for: Synthesis of polycaprolactone-polyimide-polycaprolactone triblock copolymers via a 2-step sequential copolymerization and their application as carbon nanotube dispersants
Source: Royal Society of Chemistry journal article supplement (doi:10.1039/c6py01933a), 2016-12-17
Supplement: c6py01933a1.pdf [file c6py01933a1.pdf]

## Electronic Supplementary Information

# Synthesis of Polycaprolactone-Polyimide-Polycaprolactone Triblock Copolymers via a 2-step Sequential Copolymerization and their Application as Carbon Nanotube Dispersants

Chengyin Liu<sup>a†</sup>, Bo Liu<sup>b†</sup>, Mary B. Chan-Park<sup>a,b\*</sup>

<sup>a</sup>School of Chemical and Biomedical Engineering, Nanyang Technological University, 62 Nanyang Drive, Singapore 637459, Singapore

<sup>b</sup>Lee Kong Chien School of Medicine, Nanyang Technological University, 62 Nanyang Drive, Singapore 637459, Singapore

**Fig. S1** <sup>1</sup>H NMR of (a) PCL (300M, CDCl<sub>3</sub>, 25 °C), (b) HP1 (300M, *d*<sub>6</sub>-DSMO, 25 °C) and (c) TB1a (300M, *d*<sub>6</sub>-DSMO, 25 °C) (\* : NMP residue).

**Fig. S2** FTIR spectra of PCL, HP1 and TB1a.

**Fig. S3** <sup>1</sup>H NMR spectrum of HP2 (300M, *d*<sub>6</sub>-DSMO, 25 °C).

**Fig. S4** <sup>1</sup>H NMR spectrum of HP3 (300M, *d*<sub>6</sub>-DSMO, 25 °C).

**Fig. S5** <sup>1</sup>H NMR spectrum of TB1b (300M, *d*<sub>6</sub>-DSMO, 25 °C).

**Fig. S6** <sup>1</sup>H NMR spectrum of TB2 (300M, *d*<sub>6</sub>-DSMO, 25 °C).

**Fig. S7** <sup>1</sup>H NMR spectrum of TB3 (300M, *d*<sub>6</sub>-DSMO, 25 °C).

**Fig. S8** <sup>1</sup>H NMR spectrum of TB1c (300M, *d*<sub>6</sub>-DSMO, 25 °C).

**Fig. S9** <sup>1</sup>H NMR spectrum of TB1d (300M, *d*<sub>6</sub>-DSMO, 25 °C).

**Fig. S10** <sup>1</sup>H NMR spectrum of TB1e (300M, *d*<sub>6</sub>-DSMO, 25 °C).

**Fig. S11.** GPC curves of OH-PI-OH (HP1, HP2, HP3) and PCL-PI-PCL (TB1a, TB1b, TB2, TB3).

**Fig. S12.** GPC curves of three new PCL-PI-PCL synthesized from HP1 (TB1c, TB1d, TB1e).

**Fig. S13** UV-Vis-NIR absorption spectrum of TB1a polymer in THF.

**Fig. S14** SWNT concentrations of different molecular weight TBs ((a) TB1a, TB1b, TB1c, TB1d, TB1e (b) TB1c, TB2, TB3) dispersed in THF under different conditions: immediately after sonication, after centrifugation at 6000 rpm for 10 mins, and after centrifugation at 10000 rpm for 10 mins.

**Table S1** Solubility of different PCL-PI-PCL triblock polymers.

**Table S2** Solubility of PCL, OH-PI-OH (HP1) and PCL-PI-PCL (TB1a).

**Table S3** PCL-PI-PCL triblock copolymers initiated by HP1.

Supporting Figures and Tables

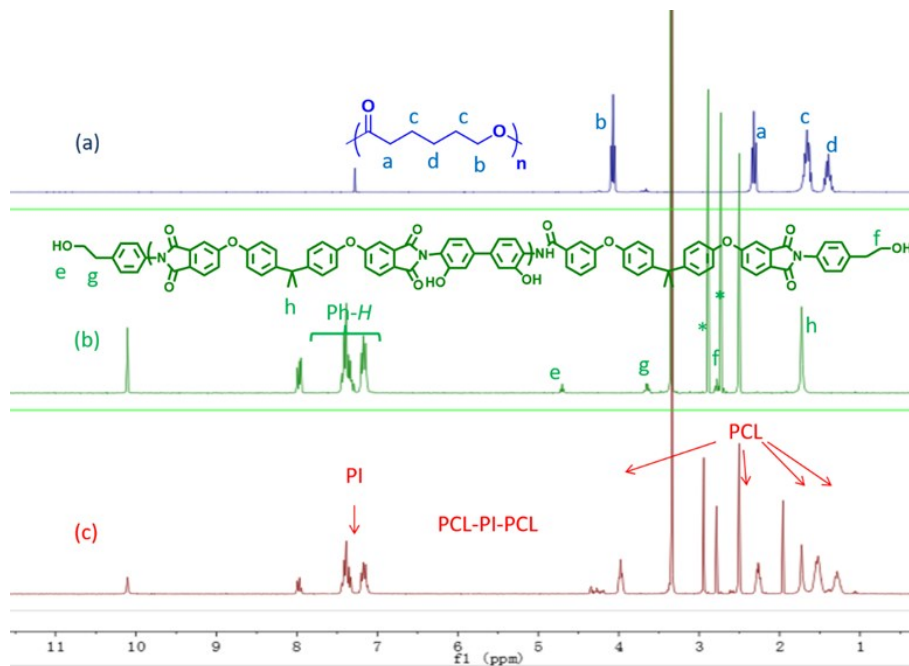

**Fig. S1**  $^1\text{H}$  NMR of (a) PCL (300M,  $\text{CDCl}_3$ , 25  $^\circ\text{C}$ ), (b) HP1 (300M,  $d_6$ -DSMO, 25  $^\circ\text{C}$ ) and (c) TB1a (300M,  $d_6$ -DSMO, 25  $^\circ\text{C}$ ) (\* : NMP residue).

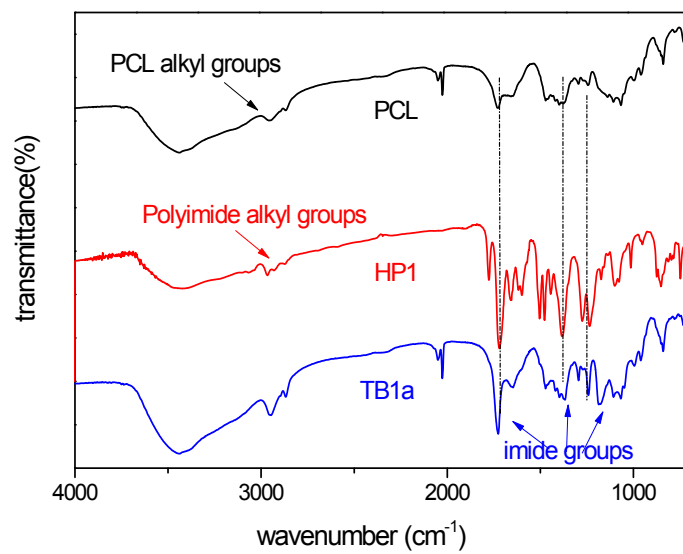

**Fig. S2** FTIR spectra of PCL, HP1 and TB1a.

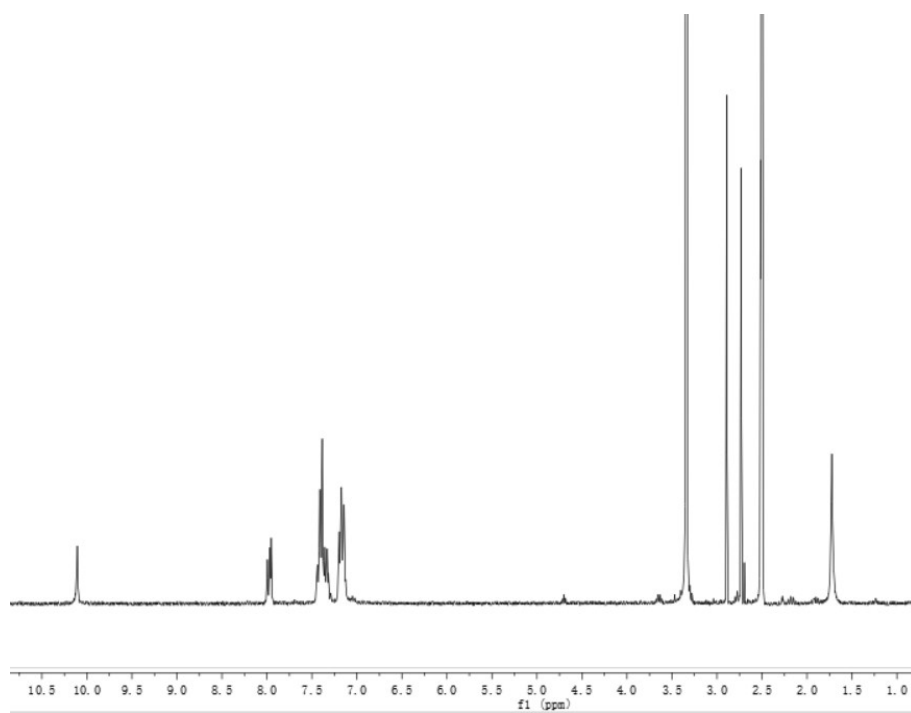

**Fig. S3**  $^1\text{H}$  NMR spectrum of HP2 (300M,  $d_6$ -DSMO, 25 °C).

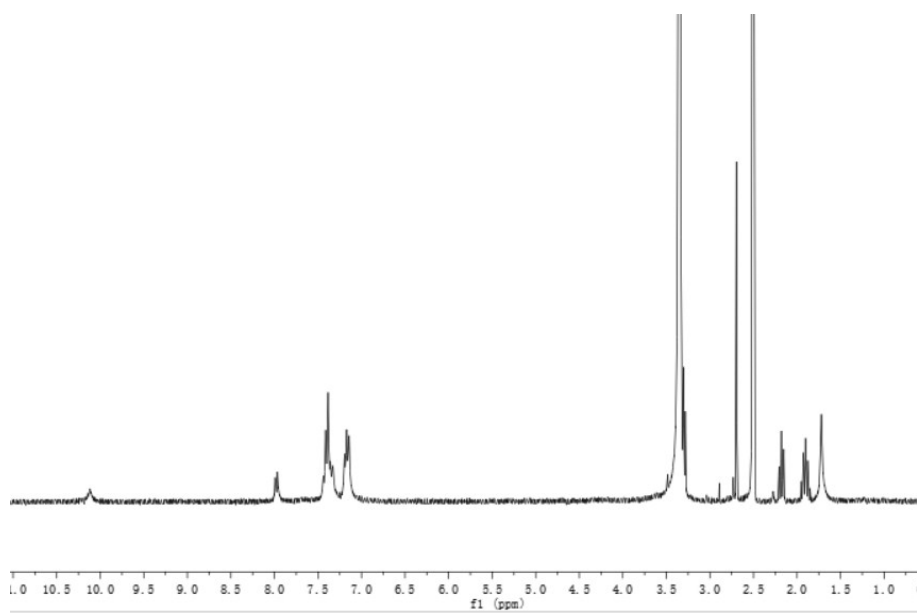

**Fig. S4**  $^1\text{H}$  NMR spectrum of HP3 (300M,  $d_6$ -DSMO, 25 °C).

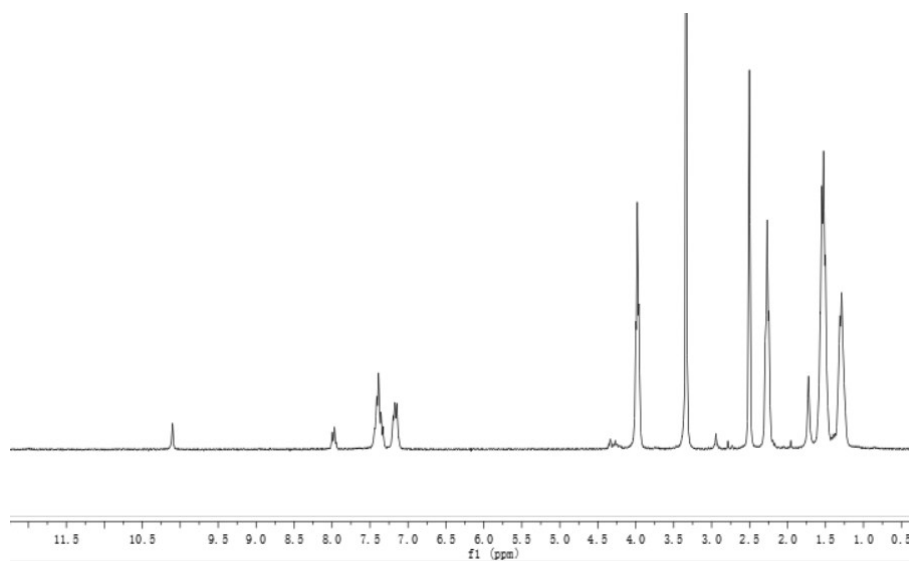

**Fig. S5** <sup>1</sup>H NMR spectrum of TB1b (300M, *d*<sub>6</sub>-DSMO, 25 °C).

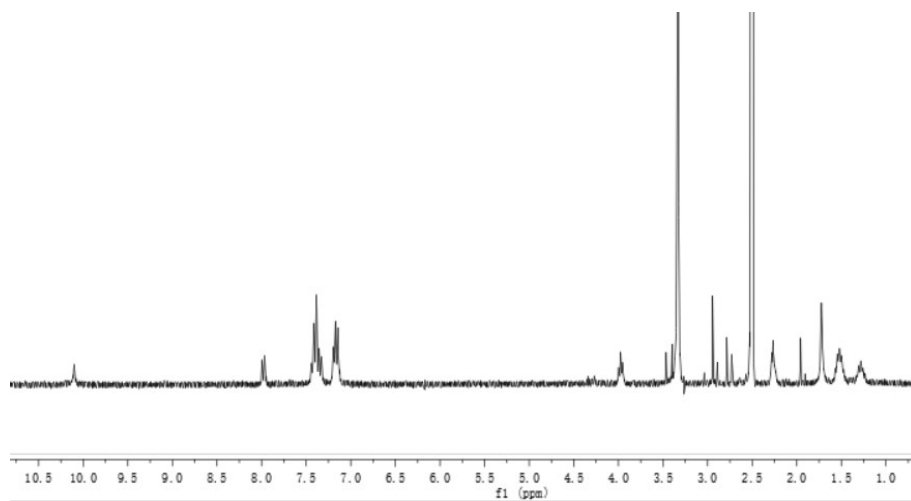

Fig. S6 <sup>1</sup>H NMR spectrum of TB2 (300M, *d*<sub>6</sub>-DSMO, 25 °C).

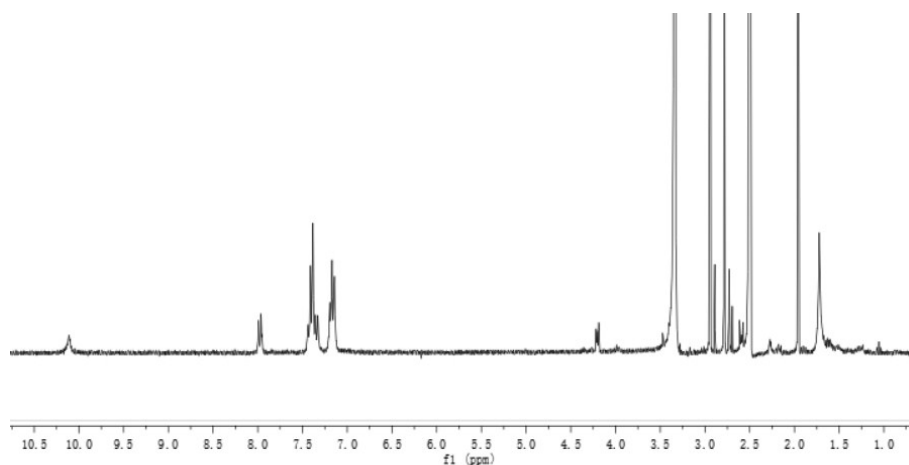

**Fig. S7**  $^1\text{H}$  NMR spectrum of TB3 (300M,  $d_6$ -DSMO, 25 °C).



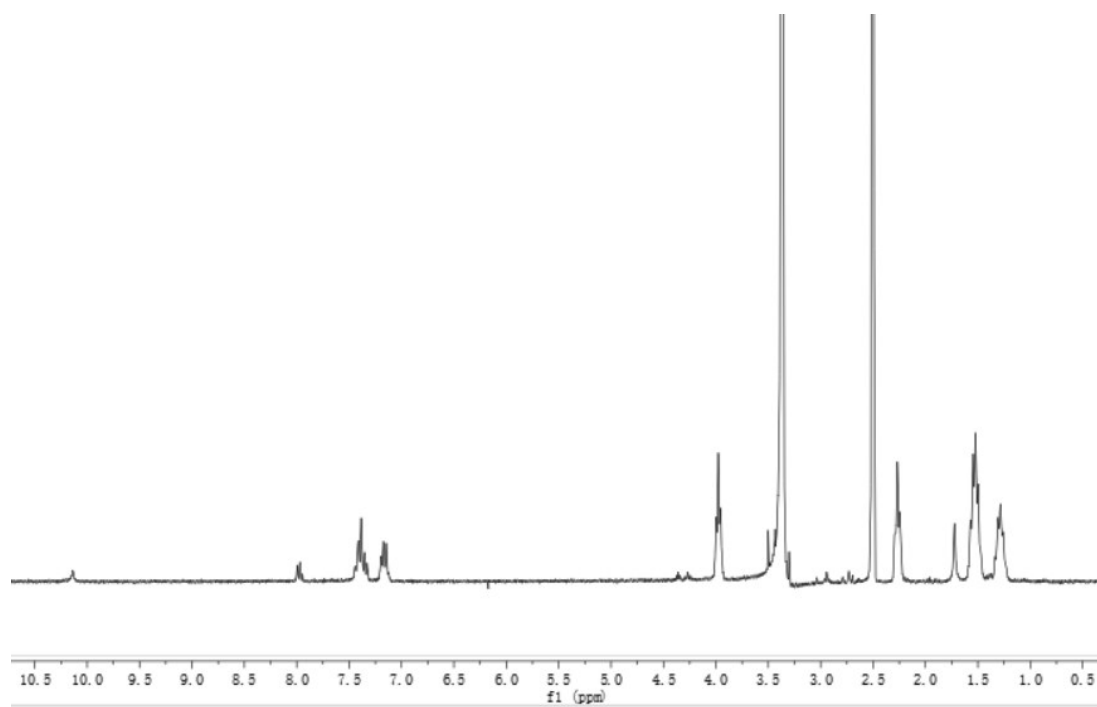

**Fig. S8**  $^1\text{H}$  NMR spectrum of TB1c (300M,  $d_6$ -DSMO, 25 °C).

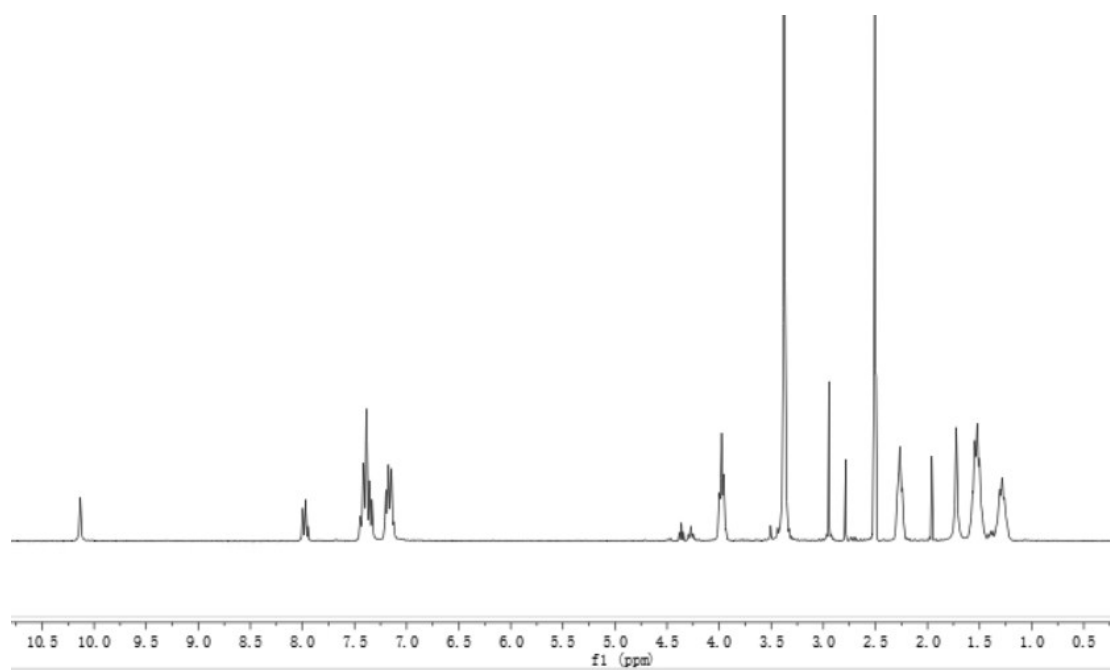

**Fig. S9**  $^1\text{H}$  NMR spectrum of TB1d (300M,  $d_6$ -DSMO, 25 °C).

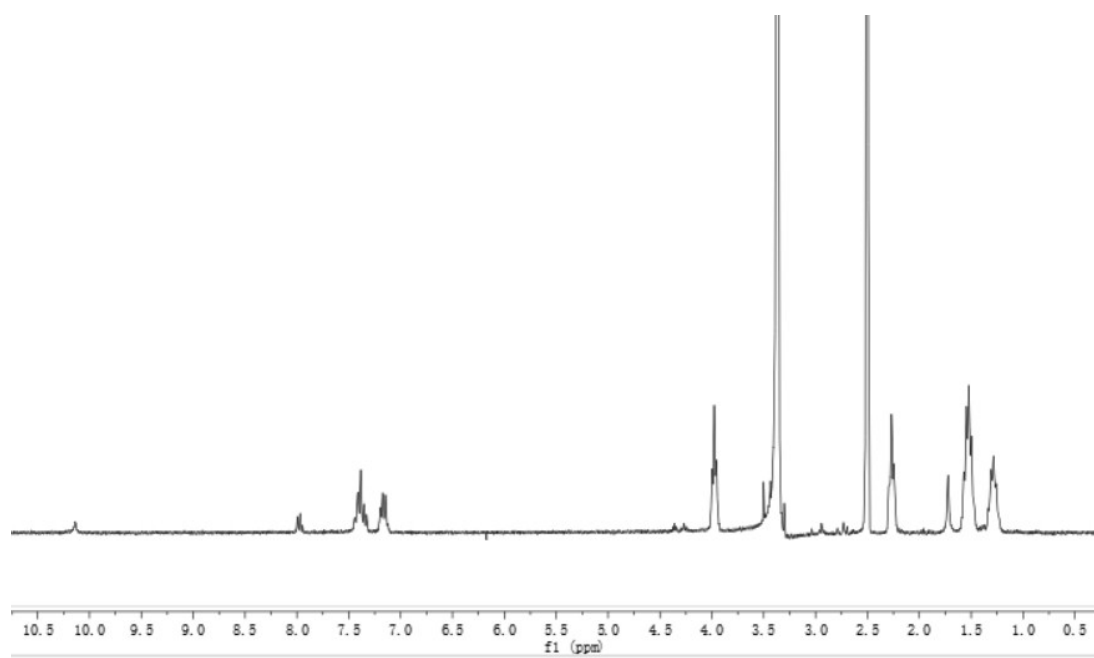

**Fig. S10**  $^1\text{H}$  NMR spectrum of TB1e (300M,  $d_6$ -DSMO, 25 °C).

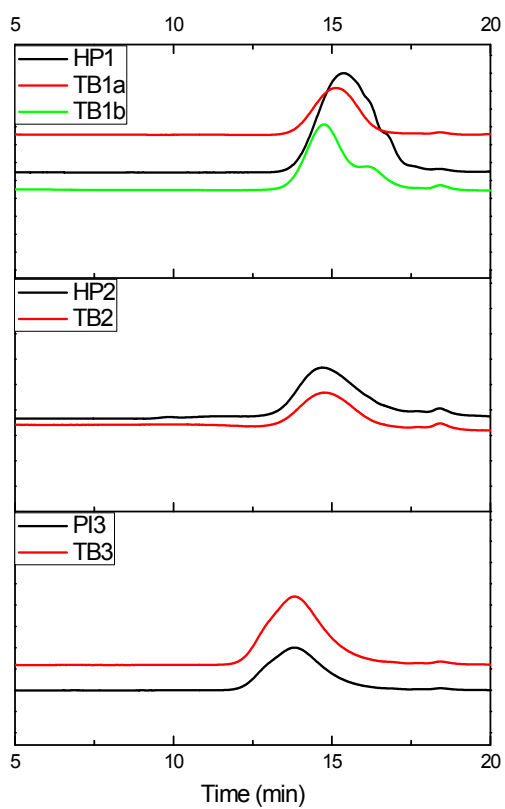

**Fig. S11** GPC curves of OH-PI-OH (HP1, HP2, HP3) and PCL-PI-PCL (TB1a, TB1b, TB2, TB3).

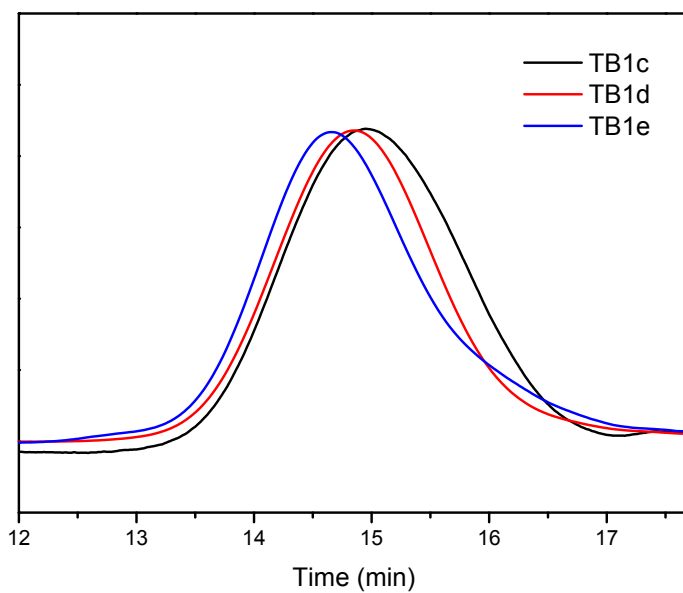

**Fig. S12.** GPC curves of three new PCL-PI-PCL synthesized from HP1 (TB1c, TB1d, TB1e).

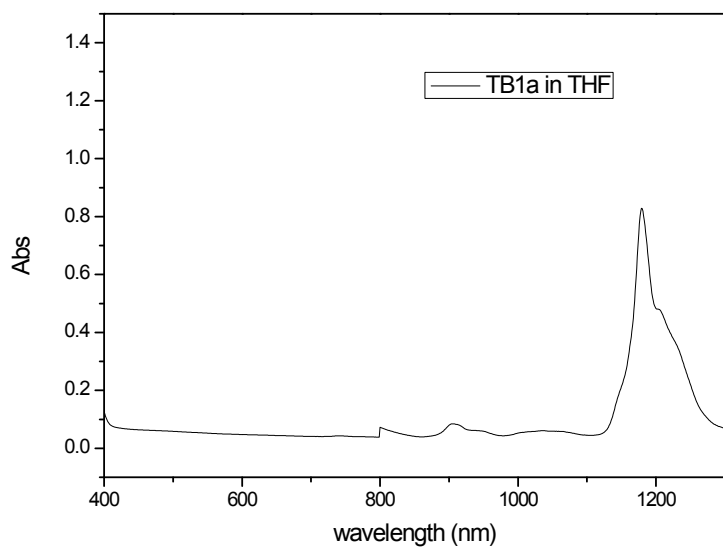

**Fig. S13** UV-Vis-NIR absorption spectrum of TB1a polymer in THF.

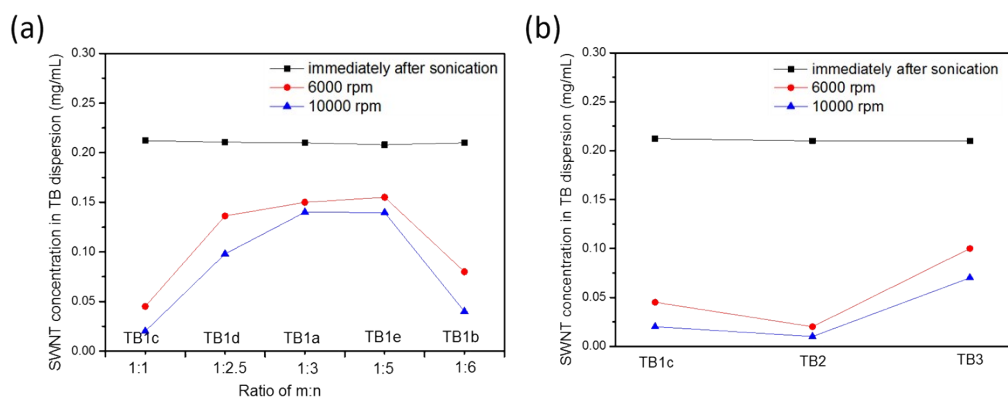

**Fig. S14** (see Scheme 1 for meaning of m and n) SWNT concentrations of different molecular weight TBs ((a) TB1a, TB1b, TB1c, TB1d, TB1e (b) TB1c, TB2, TB3) dispersed in THF under different conditions: immediately after sonication, after centrifugation at 6000 rpm for 10 mins, and after centrifugation at 10000 rpm for 10 mins.

**Table S1** Solubility of different PCL-PI-PCL triblock polymers.

| Polymer | solubility |     |     |                   |     |         |        |      |
|---------|------------|-----|-----|-------------------|-----|---------|--------|------|
|         | NMP        | DMF | THF | CHCl <sub>3</sub> | DCM | Acetone | Hexane | MeOH |
| TB1a    | +          | +   | +   | +                 | +   | +       | +      | -    |
| TB1b    | +          | +   | +   | +                 | +   | +       | -      | -    |
| TB2     | +          | +   | +   | +                 | -   | -       | -      | -    |
| TB3     | +          | +   | +   | -                 | -   | -       | -      | -    |

+, good solubility; -, insoluble after 30 mins

**Table S2** Solubility of PCL, OH-PI-OH (HP1) and PCL-PI-PCL (TB1a).

| Polymer | solubility |     |     |                   |     |         |        |      |
|---------|------------|-----|-----|-------------------|-----|---------|--------|------|
|         | NMP        | DMF | THF | CHCl <sub>3</sub> | DCM | Toluene | Hexane | MeOH |
| PCL     | +          | +   | +   | +                 | +   | +       | +      | -    |
| TB1a    | +          | +   | +   | +                 | +   | -       | -      | -    |
| HP1     | +          | +   | +   | -                 | -   | -       | -      | -    |

+, good solubility; -, insoluble after 30 mins

**Table S3** PCL-PI-PCL triblock copolymers initiated by HP1 (M<sub>n</sub> = 6000 Da).

| Sample | Design<br>[PI]:[CL] <sup>a</sup> | TB measured M <sub>n</sub> (Da)<br>/PDI <sup>b</sup> | Actual Repeating<br>PI units (m) <sup>c</sup> | Actual Repeating CL<br>Units (2n) <sup>c</sup> | Actual<br>Ratios of<br>n:m:n |
|--------|----------------------------------|------------------------------------------------------|-----------------------------------------------|------------------------------------------------|------------------------------|
| TB1c   | 1:25                             | 9400/1.46                                            | 9                                             | 20                                             | 1:1:1                        |
| TB1d   | 1:50                             | 11500/1.61                                           | 9                                             | 46                                             | 2.5:1:2.5                    |
| TB1a   | 1:100                            | 13200/1.40                                           | 9                                             | 60                                             | 3:1:3                        |
| TB1e   | 1:150                            | 16600/1.55                                           | 9                                             | 90                                             | 5:1:5                        |
| TB1b   | 1:200                            | 19700/1.25                                           | 9                                             | 120                                            | 6:1:6                        |

<sup>a</sup> Molar ratio of polyimide macroinitiator and caprolactone monomers for ring-opening polymerization;

<sup>b</sup> Determined from GPC using polystyrene standards as references;

<sup>c</sup> Calculated from the molecular weight of polymers and single units.
